# Supplementary material for: Engineering programmable material-to-cell pathways via synthetic notch receptors to spatially control differentiation in multicellular constructs
Source: PubMed Central journal article supplement (PMC11246427; doi:10.1038/s41467-024-50126-1), 2024-07-13
Supplement: 41467_2024_50126_MOESM1_ESM.pdf [file 41467_2024_50126_MOESM1_ESM.pdf]

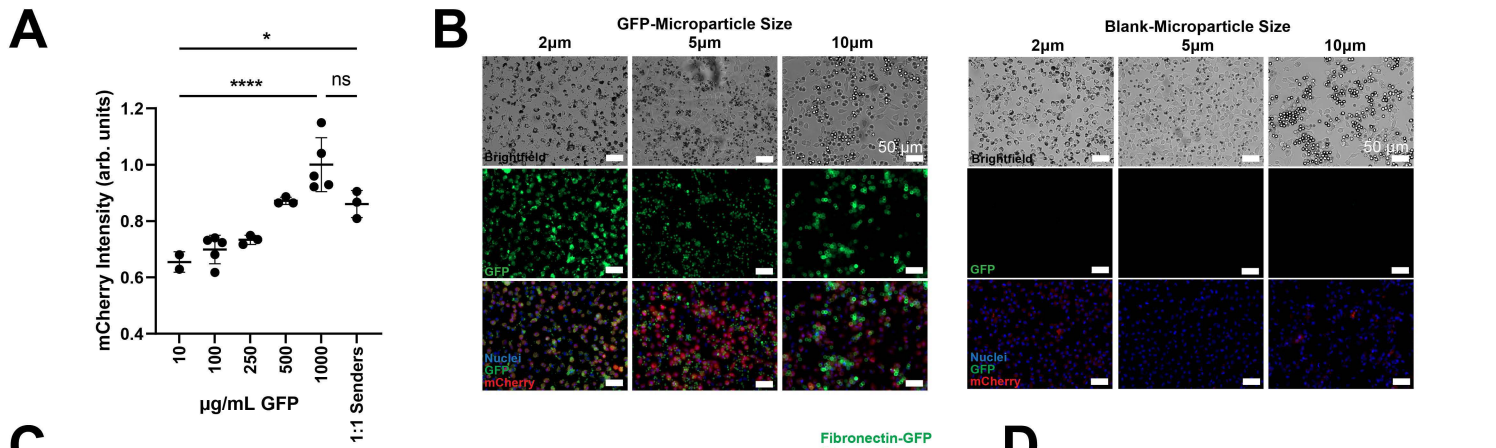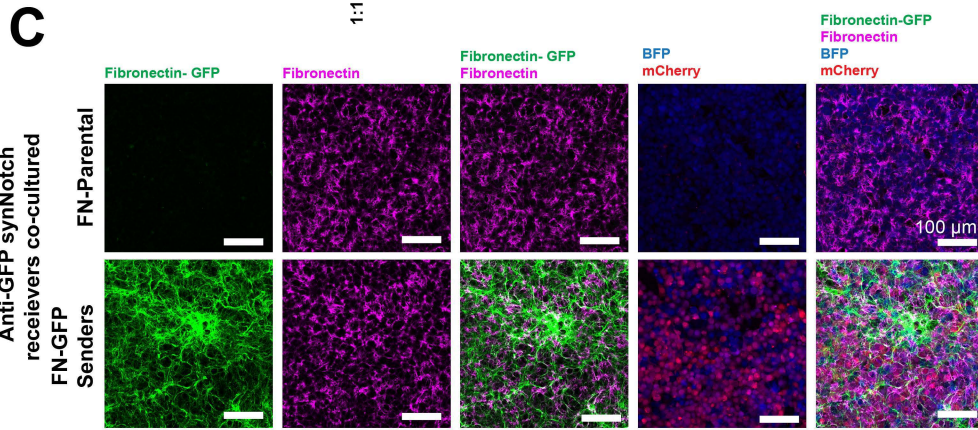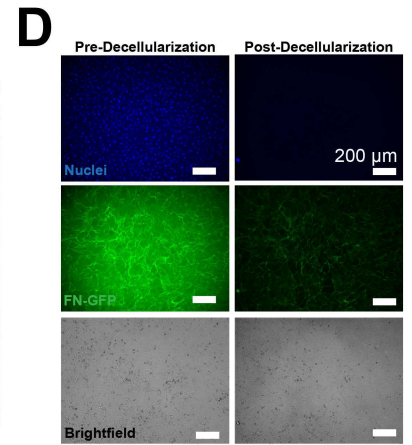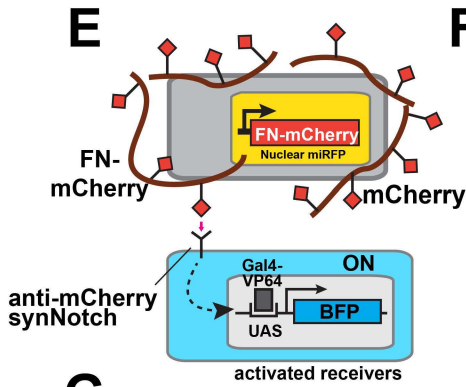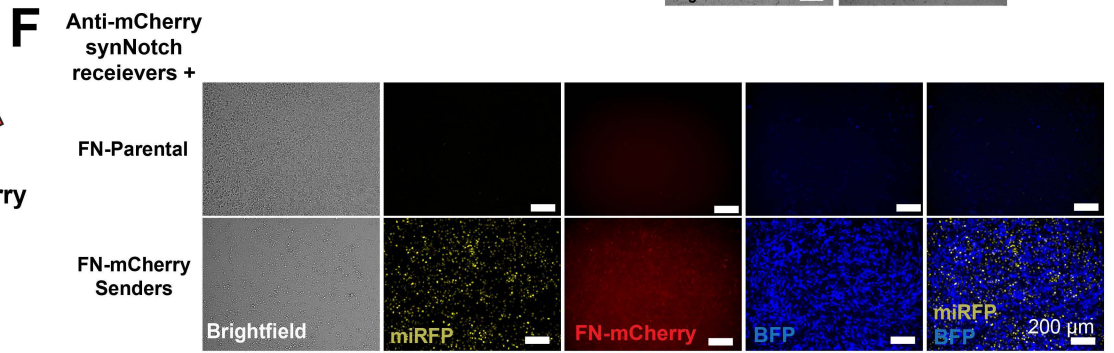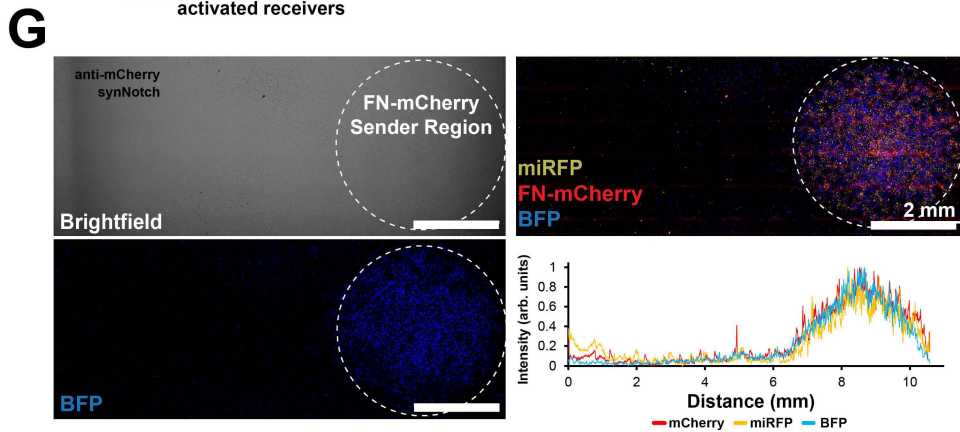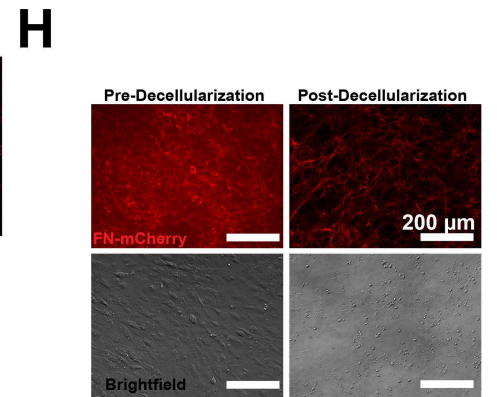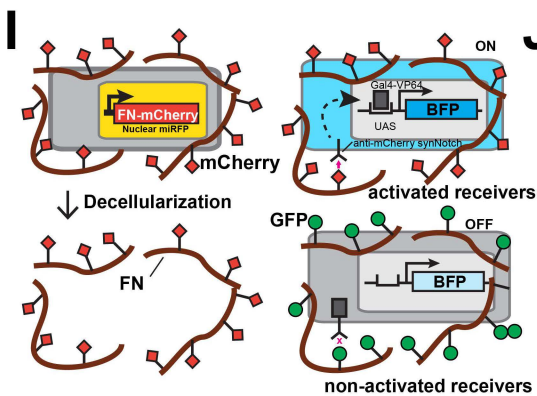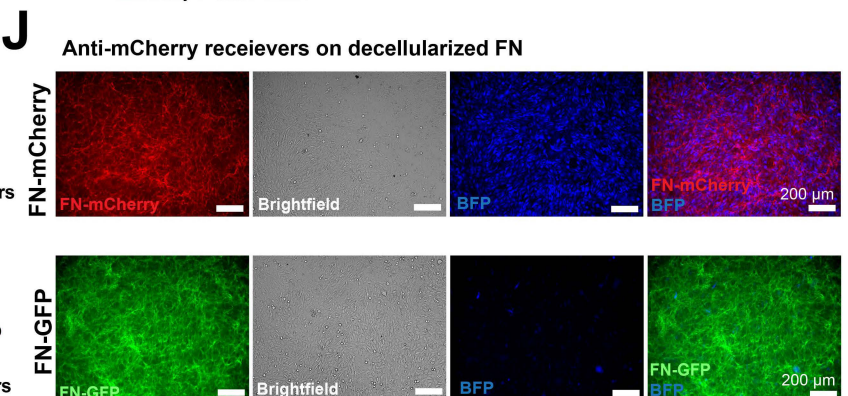

**Figure S1.** (A) Average mCherry intensity of activated reporter cells quantified by image analysis following 24-hour co-culture with 5 $\mu$ m GFP microparticles conjugated at the indicated concentrations or GFP sender cells. Data represent mean  $\pm$  s.d. From left to right, n=2, 5, 3, 3, 5, 3 biological replicates. p=0.0552 (ns), p=0.0191 (\*), p<0.0001(\*\*\*\*) determined via one-way ANOVA and Tukey's test. (B) Brightfield and fluorescence microscopy images of GFP-conjugated (left) and blank (right) microparticles of varying sizes following 24-hour co-culture with engineered receiver fibroblasts. Scale bars, 50  $\mu$ m. Experiment was performed two times with similar results. (C) Fluorescence microscopy images of anti-GFP synNotch receiver fibroblasts co-cultured with 3T3 parental fibroblasts (top) or Fibronectin-GFP (FN-GFP) sender fibroblasts for 72 hours, then immunostained for fibronectin (purple). Scale bars, 100  $\mu$ m. Experiment was performed once. (D) Fluorescence and brightfield microscopy images of FN-GFP sender cells pre- and post-decellularization, showing nuclei (blue) and FN-GFP (green). Scale bars, 200  $\mu$ m. Experiment was performed four times with similar results. (E) Schematic of sender fibroblasts producing fibronectin-mCherry (FN-mCherry) with a miRFP nuclear tag co-cultured with anti-mCherry/Gal4 synNotch receiver fibroblasts that activate a BFP reporter. (F) Fluorescence microscopy images of anti-mCherry synNotch receiver fibroblasts co-cultured with parental fibroblasts (top) or FN-mCherry sender fibroblasts (bottom) for 48 hours. Scale bars, 200  $\mu$ m. Experiment was performed four times with similar results. (G) Brightfield and fluorescence microscopy images of anti-mCherry synNotch fibroblasts that activate BFP uniformly seeded on a region of FN-mCherry sender fibroblasts, which were seeded 30 minutes prior as a small droplet. White dotted line indicates the region where FN-mCherry sender fibroblasts were seeded. Line plot represents the normalized fluorescence intensity across the x-axis for one sample. Scale bars, 2 mm. Experiment was performed four times with similar results. (H) Fluorescence and brightfield microscopy images of FN-mCherry sender cells pre- and post-decellularization, showing FN-mCherry (red). Scale bars, 200  $\mu$ m. Experiment was performed four times with similar results. (I) Schematic of FN-mCherry deposition by FN-mCherry sender cells, decellularization, and reseeding with receiver fibroblasts. Receiver fibroblasts were also reseeded into decellularized FN-GFP deposited by FN-GFP sender cells. (J) Fluorescence microscopy images of anti-mCherry synNotch receiver fibroblasts that activate BFP cultured on decellularized FN-mCherry (top) or FN-GFP (bottom) for 48 hours. Experiment was performed five times with similar results. Source data are provided as a Source Data file.

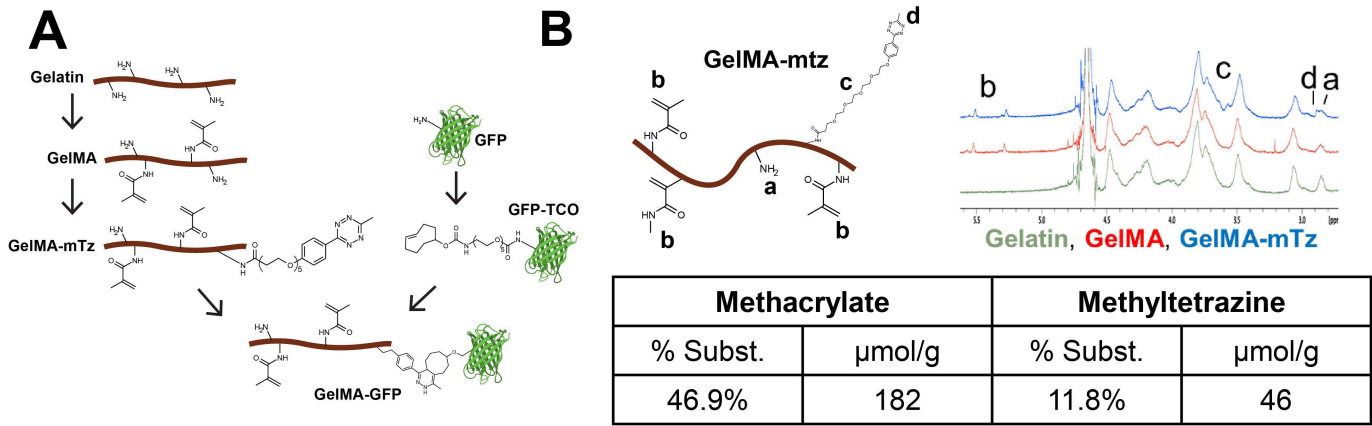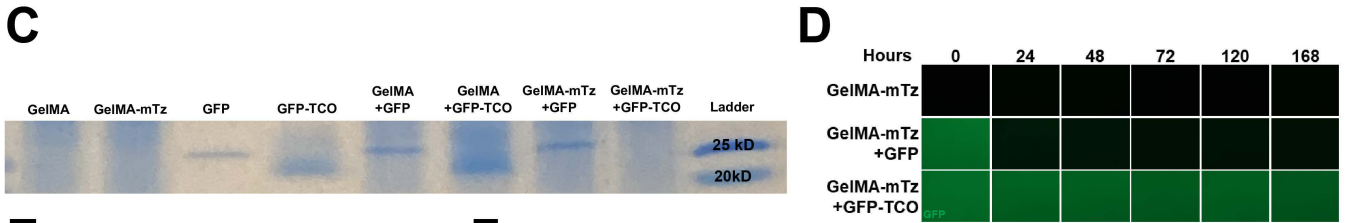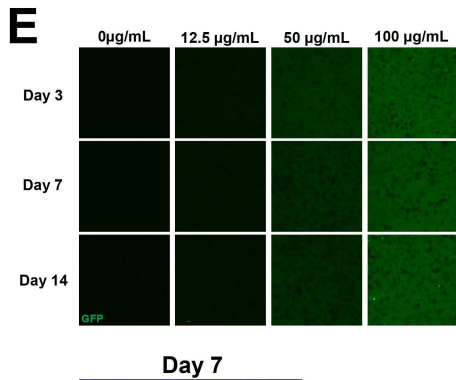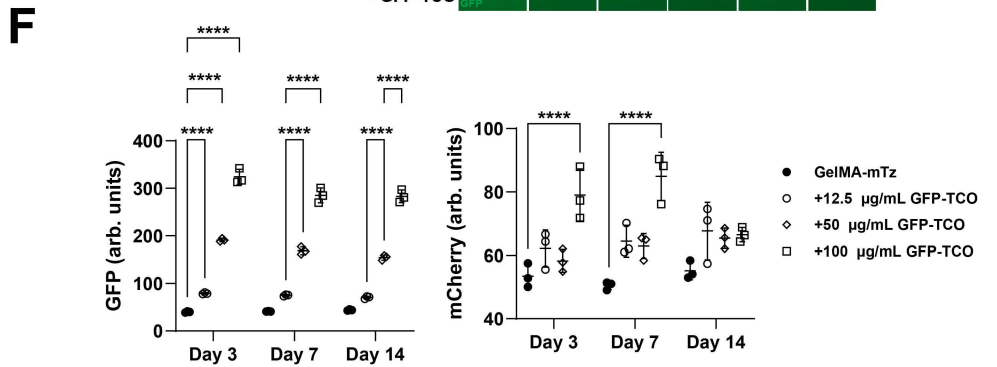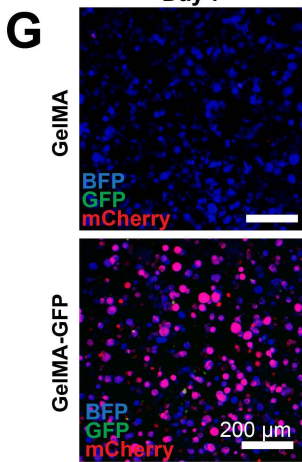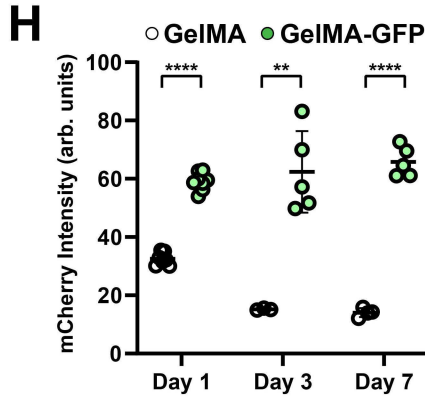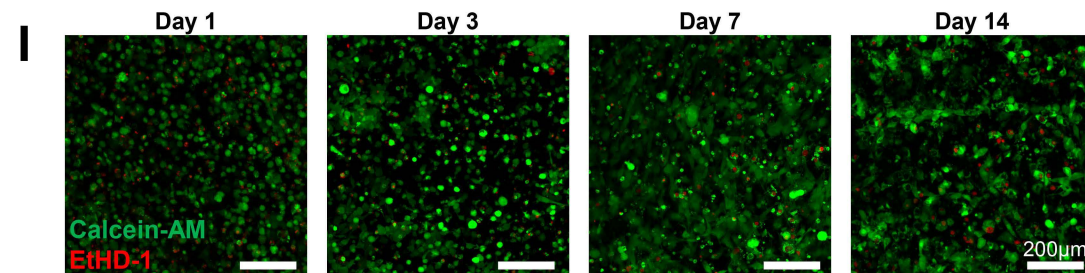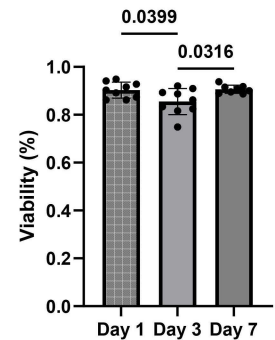

**Figure S2.** (A) Schematic of covalent substitutions to gelatin with methacrylate (MA) and methyltetrazine (mTz) to generate GelMA-mTz, and to GFP with trans-cyclooctene (TCO) to generate GFP-TCO. When combined, GelMA-mTz and GFP-TCO generate gelatin methacryloyl (GelMA) conjugated to GFP (GelMA-GFP). (B) Functional groups of GelMA-mTz with corresponding NMR peaks during each step of gelatin modification. Percent substitution and molar content of methacrylate group and methyltetrazine estimated with <sup>1</sup>H-NMR. Experiment was performed three times with similar results. (C) Coomassie-blue stained SDS-PAGE gel of indicated combinations of GelMA±mTz with GFP±TCO to determine conjugation. GelMA±mTz is faintly visible due to polydisperse molecular weight. Darker bands indicate GFP (MW: 27 kDa). Protein ladder (right) shown for 25 kDa reference. Experiment was performed four times with similar results. Full gel images are provided in the Source Data file. (D) Fluorescence microscopy images of GFP in GelMA-mTz hydrogels loaded with either no GFP, GFP, or GFP-TCO incubated in PBS at 37°C for indicated hours. Experiments were performed three times with similar results. (E) Fluorescence microscopy images of GFP for anti-GFP synNotch receiver fibroblast-laden GelMA-mTz hydrogels loaded with indicated concentrations of GFP-TCO and cultured for the indicated number of days. (F) Quantification, based on image analysis, of GFP intensity and mCherry intensity for GelMA-mTz hydrogels with indicated concentrations of GFP-TCO and laden with anti-GFP synNotch receiver fibroblasts that activate mCherry, cultured for the indicated number of days. Data represents mean ± s.d, n=3 biological replicates. p<0.0001(\*\*\*\*) determined via two-way ANOVA and Tukey's test. (G) Z-projection of confocal microscopy images of anti-GFP synNotch fibroblasts that activate mCherry encapsulated in GelMA-mTz hydrogels containing 0 (GelMA) or 50ug/mL GFP-TCO (GelMA-GFP) at Day 7 of culture. Scale bars, 200µm. Related to Fig. 2E. (H) Percent of mCherry expressing receiver cells quantified by image analysis after 1, 3, and 7 days of culture within GelMA or GelMA-GFP hydrogels. From left to right, n=7, 8, 3, 5, 4, 5 biological replicates. p=0.0013 (\*\*), p<0.0001(\*\*\*\*) determined via unpaired two-tailed t-test. (I) Fluorescence images of anti-GFP synNotch fibroblast-laden GelMA hydrogels stained with Live/Dead at the indicated days in culture. Live cells are labeled with Calcein-AM (green) and dead cells are labeled with ethidium homodimer-1 (EtHD-1, red). Scale bars, 200µm. Viability calculated as (number of live cells) / (number of live cells + number of dead cells). Data represents mean ± s.d. From left to right, n=9,9,8 biological replicates. Indicated p-values determined via one-way ANOVA and Tukey's test. Source data are provided as a Source Data file.

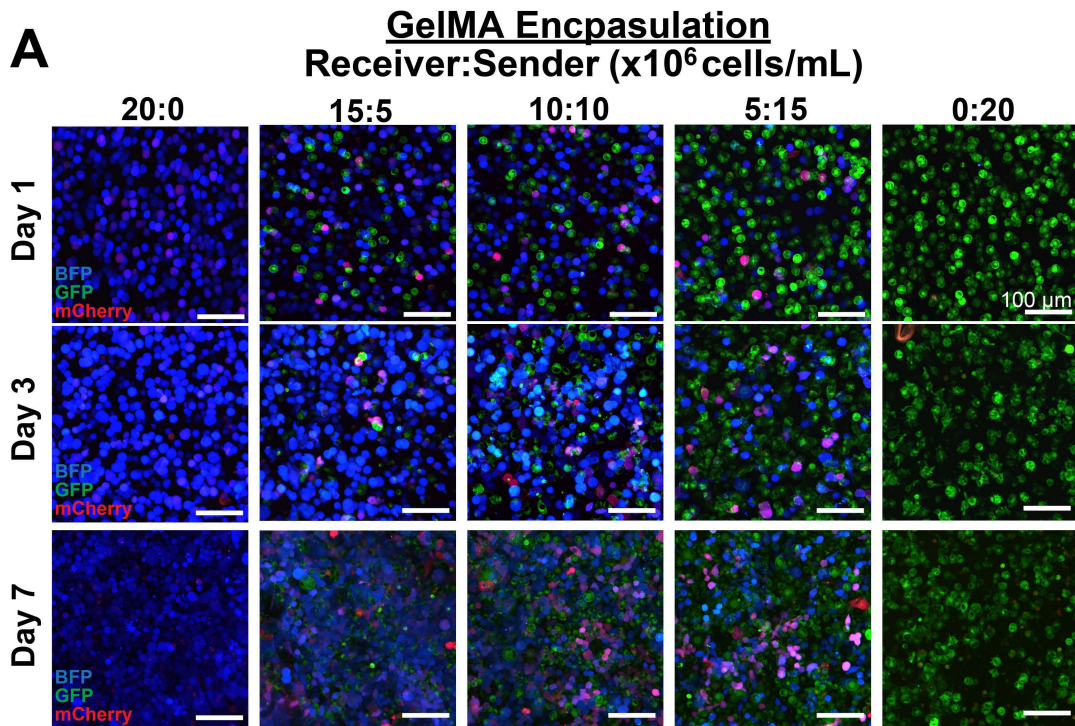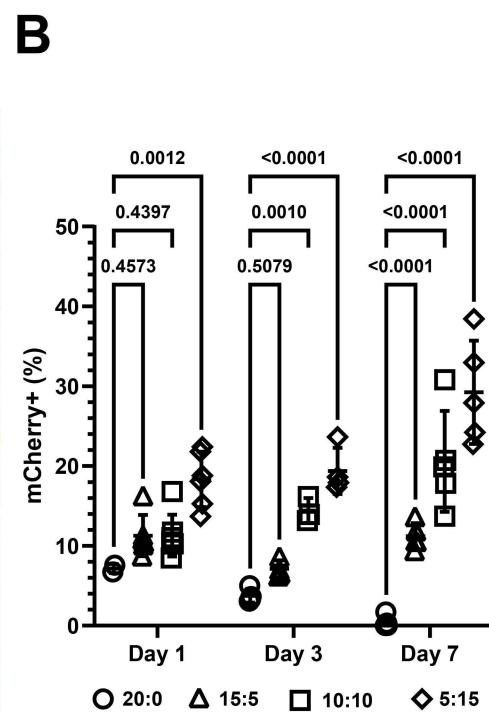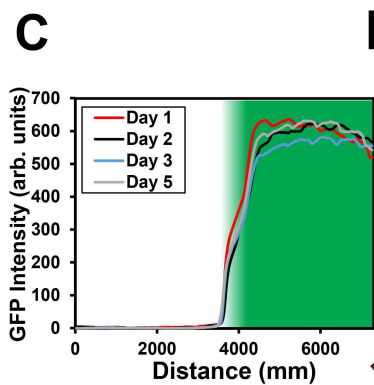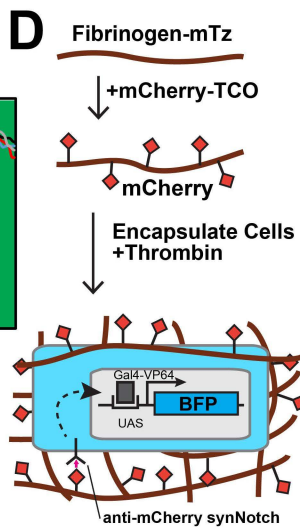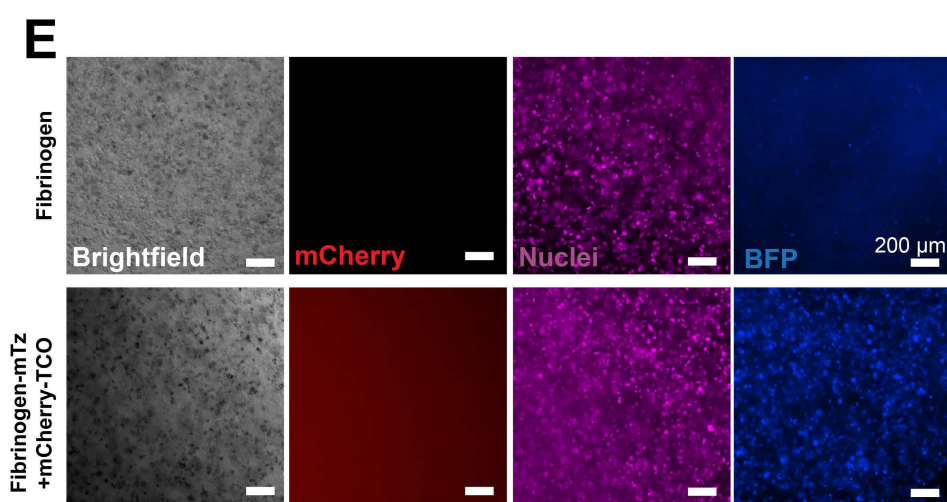

**Figure S3.** (A) Z-projection of confocal microscopy images of anti-GFP synNotch receiver fibroblasts that activate mCherry co-encapsulated with GFP sender fibroblasts in indicated Receiver:Sender ratios at indicated days following encapsulation. Scale bars, 100  $\mu\text{m}$ . (B) Percent of mCherry expressing receiver cells quantified by image analysis after indicated days of culture with indicated ratios of sender cells. Data represents mean  $\pm$  s.d. From left to right, n=2,6,7,6,4,4,3,4,5,5,5,5 technical replicates from two biological replicates. Indicated p-values determined via two-way ANOVA and Tukey's test. (C) Plot profile of normalized GFP intensity across the length of a bi-phasic GelMA hydrogel, where only the right portion contains GFP, at indicated days after encapsulation. Green shading indicates the region containing GFP. Data shown are from one replicate, experiment performed two times with similar results. (D) Schematic of Fibrinogen-mTz and mCherry-TCO reaction to generate Fibrinogen-mCherry, which was then used to encapsulate anti-mCherry synNotch fibroblasts that activate BFP. (E) Fluorescence images of anti-mCherry synNotch fibroblasts that activate BFP encapsulated in fibrinogen or fibrinogen-mTz with mCherry-TCO for 24 hours. Nuclei are stained with HSC NuclearMask Deep Red (purple). Scale bars, 200  $\mu\text{m}$ . Experiments were performed four times with similar results. Source data are provided as a Source Data file.

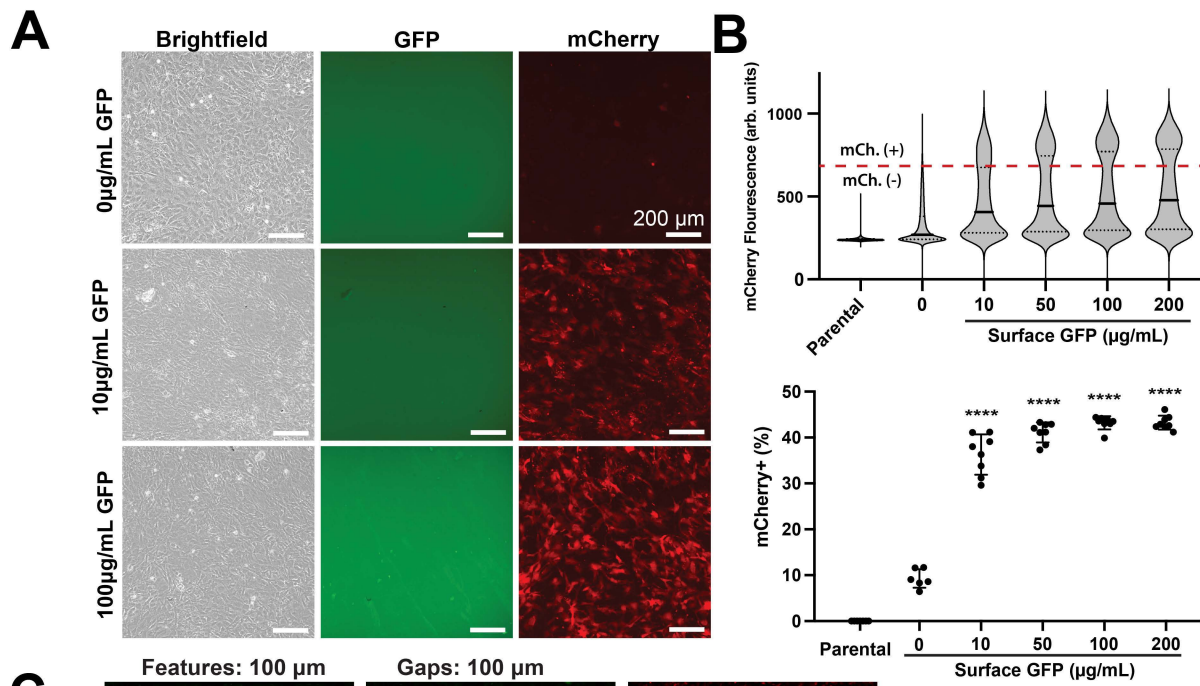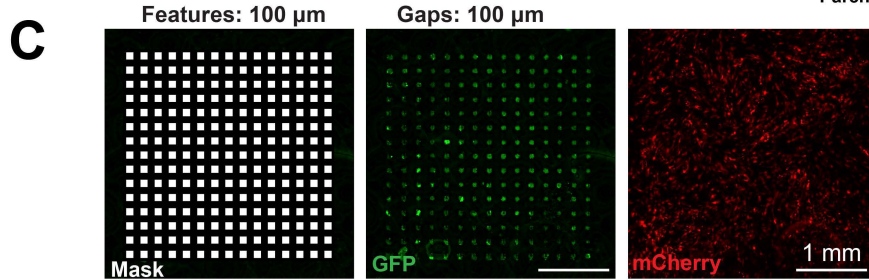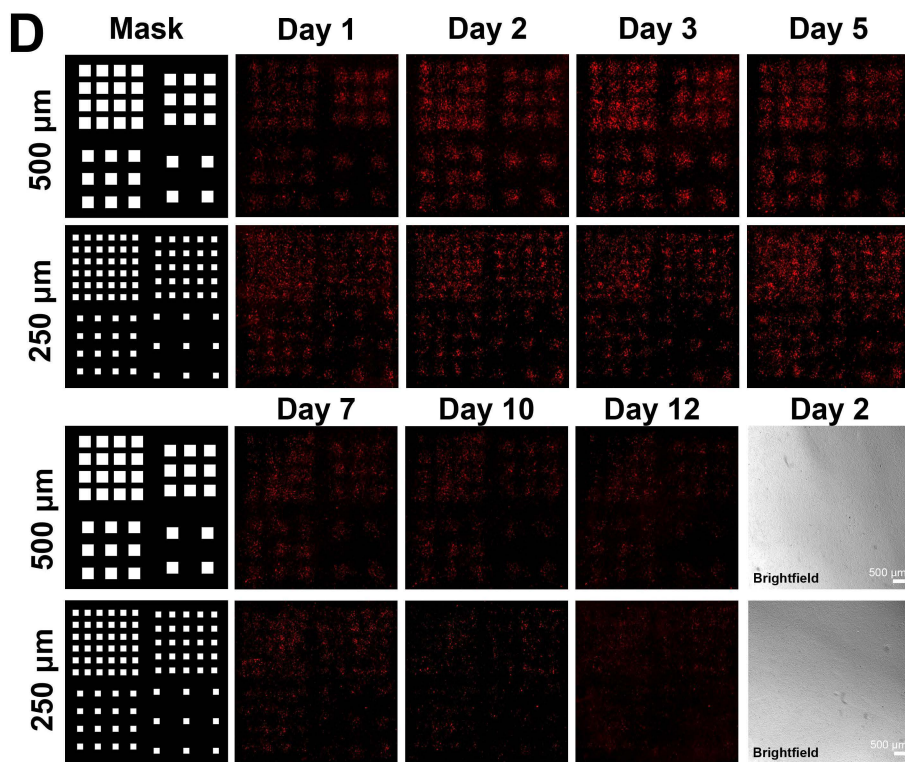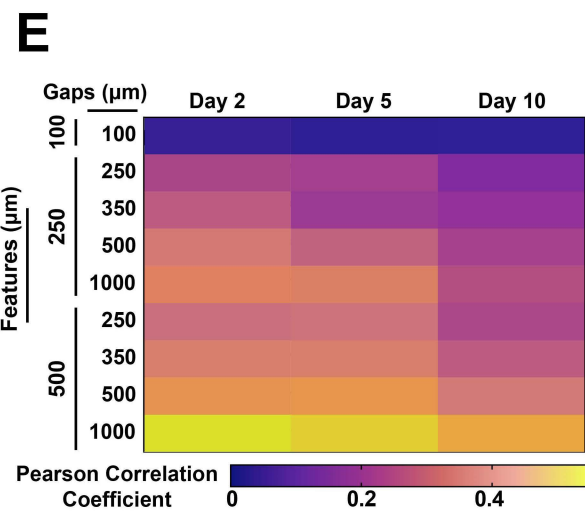

**Figure S4.** (A) Fluorescence microscopy images of anti-GFP synNotch fibroblasts that activate mCherry cultured for two days on PDMS surfaces uniformly microcontact-printed with the indicated concentrations of GFP. Scale bars, 200  $\mu\text{m}$ . (B) Violin plot of mCherry intensity (top) and percent of mCherry expressing cells (bottom), quantified by flow cytometry, for anti-GFP synNotch fibroblasts that activate mCherry cultured for two days on PDMS surfaces microcontact-printed with the indicated concentration of GFP. Parental fibroblasts cultured without GFP were also measured. Dotted line in top panel indicates the threshold value to designate mCherry-positive cells. Top data represent one biological replicate. Bottom data represent mean  $\pm$  s.d. From left to right, n=7,6,8,8,8 biological replicates.  $p < 0.0001$  (\*\*\*\*) compared to synNotch fibroblasts on 0  $\mu\text{g}/\text{mL}$  GFP determined via one-way ANOVA and Tukey's test. (C) Fluorescence microscopy images of PDMS surface microcontact-printed with 100  $\mu\text{m}$  GFP squares with 100  $\mu\text{m}$  interspace and seeded with anti-GFP synNotch fibroblasts, cultured for two days. Scale bars, 1mm. (D) Fluorescence and brightfield microscopy images of mCherry for anti-GFP synNotch fibroblasts cultured on 500  $\mu\text{m}$  (top) and 250  $\mu\text{m}$  (bottom) GFP squares with interspacing of 250  $\mu\text{m}$  (top left), 350  $\mu\text{m}$  (top right), 500  $\mu\text{m}$  (bottom left), and 1000  $\mu\text{m}$  (bottom right) for indicated days. Scale bars, 500 $\mu\text{m}$ . (E) Heatmap of Pearson correlation coefficient between mCherry and pattern mask of each square width and interspace length at Days 2, 5, and 10. Color map represents the mean coefficient. n=7 for 500x1000 $\mu\text{m}$  day 10, 500x350 $\mu\text{m}$  days 2, 5, and 10, 500x250 $\mu\text{m}$  days 2, 5, and 10, 250x1000 $\mu\text{m}$  days 2 and 5, 250x350 $\mu\text{m}$  day 2. N=8 for 500x1000 $\mu\text{m}$  days 2 and 5, 500x500 $\mu\text{m}$  days 2, 5, and 10, 250x1000 $\mu\text{m}$  day 10, 250x500 $\mu\text{m}$  days 2, 5, and 10, 250x350 $\mu\text{m}$  days 5 and 10, 250x250 $\mu\text{m}$  days 2, 5, and 10, 100x100 $\mu\text{m}$  days 2, 5, and 10. All conditions except 100x100 $\mu\text{m}$  pattern scored  $p < 0.0001$  determined via 2way ANOVA and Dunnett's multiple comparisons test compared to scrambled negative control. Source data are provided as a Source Data file.



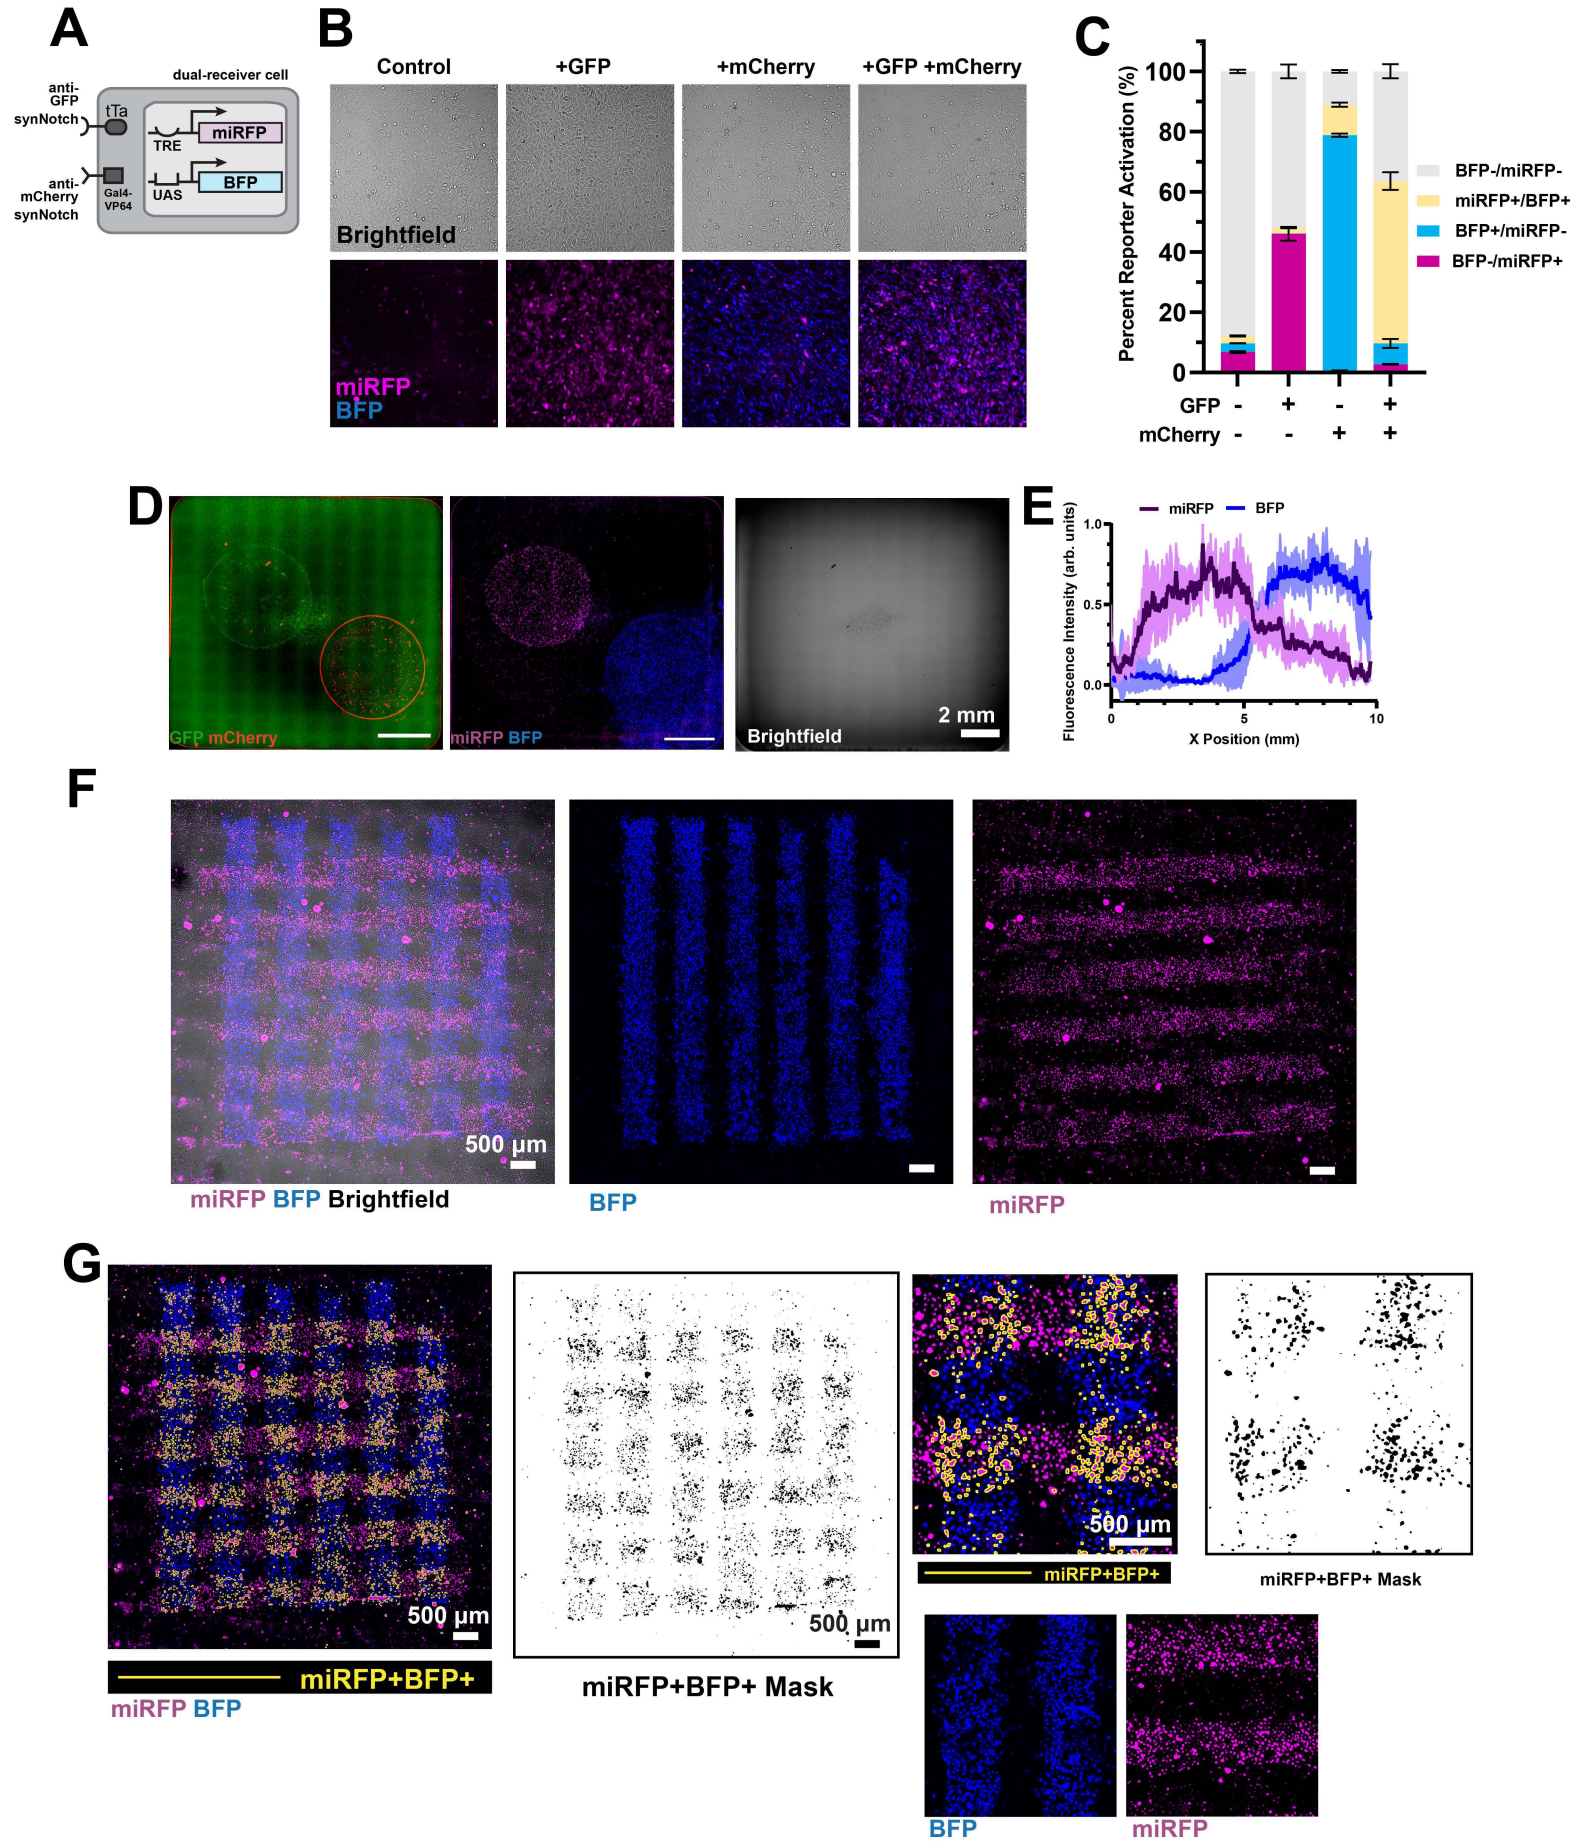

**Figure S5.** (A) Schematic of dual-reporter receiver fibroblast (L929) with anti-GFP synNotch that activates miRFP reporter gene and orthogonal anti-mCherry synNotch that activates BFP. (B) Brightfield and fluorescence microscopy images of dual-reporter receiver fibroblasts cultured on plates adsorbed with no ligand (control), GFP, mCherry, or both GFP and mCherry for one day. Scale bars, 200  $\mu\text{m}$ . (C) Percent reporter activation of dual-reporter receiver fibroblasts measured via flow cytometry on culture surfaces that were uniformly adsorbed with the indicated ligands. Data represent mean  $\pm$  s.d, n=4 biological replicates. (D) Fluorescence microscopy images of GFP and mCherry droplets adsorbed on a culture plate and subsequent expression of miRFP and BFP by dual-receiver reporter fibroblasts cultured on the plate for two days. Brightfield image shows uniform cell coverage. Scale bars, 2mm. (E) Normalized profile plots of miRFP and BFP intensity across the x-axis for images shown in (D). Solid line represents the mean, shading represents s.d. n=4 biological replicates. (F) Fluorescence and brightfield microscopy images of miRFP and BFP by dual-reporter receiver fibroblasts cultured for two days on perpendicular GFP and mCherry rows. Scale bars, 500  $\mu\text{m}$ . (G) Dual-positive miRFP and BFP masks, created using ImageJ image calculator AND function for BFP and miRFP signal above a threshold. Mask was superimposed onto fluorescence images and highlighted with a yellow border to indicate BFP+/miRFP+ cells. Scale bars, 500  $\mu\text{m}$ . Source data are provided as a Source Data file.

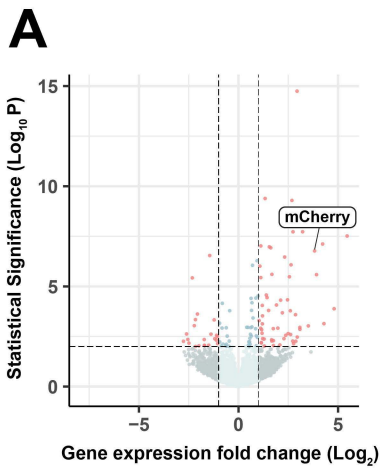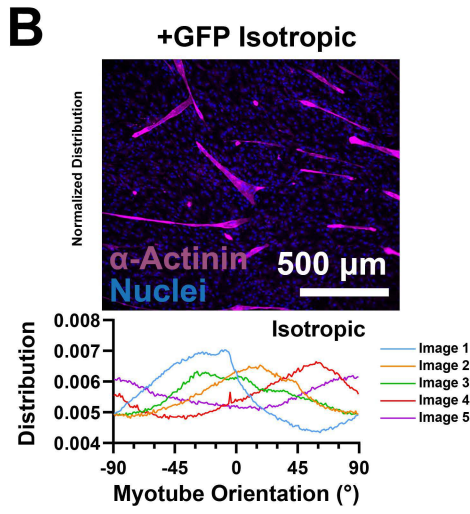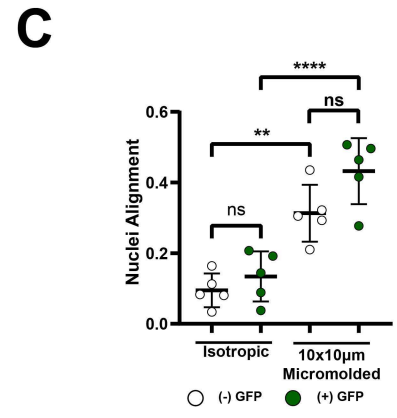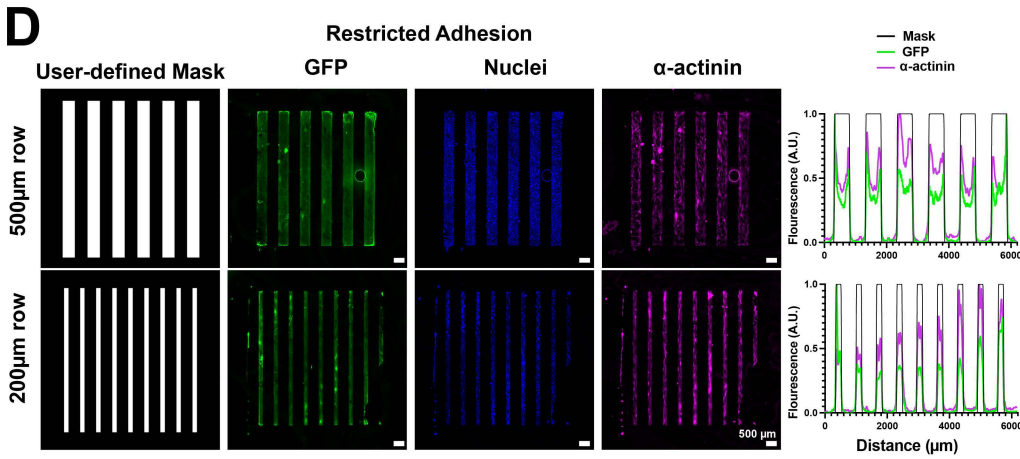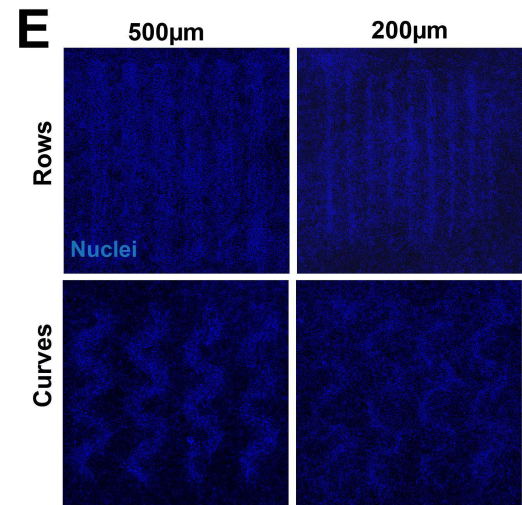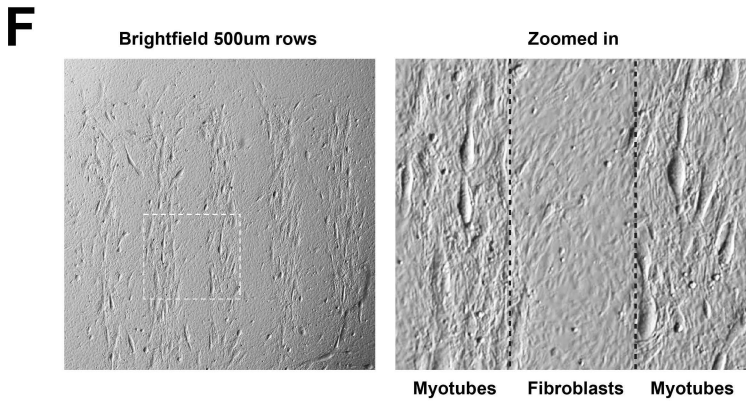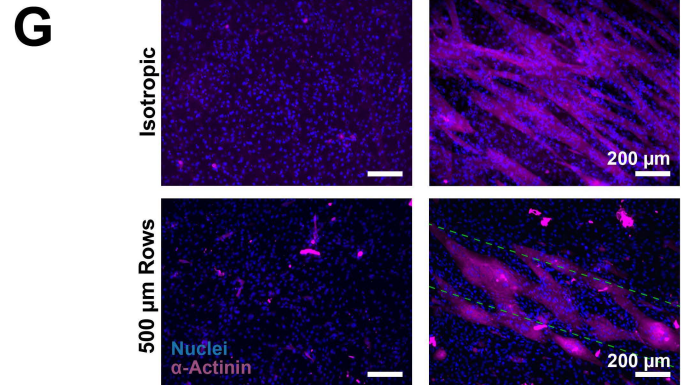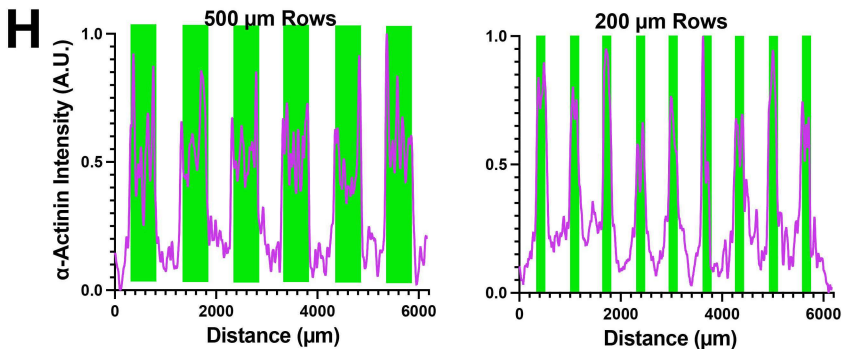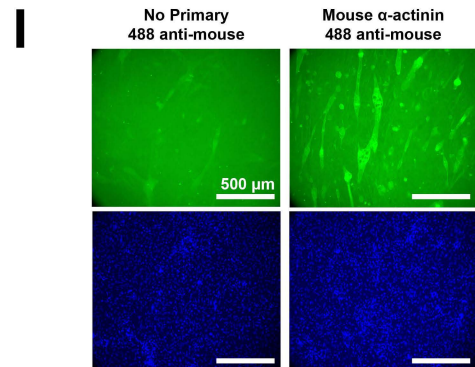

**Figure S6.** (A) Volcano plot of gene expression, quantified by bulk RNA sequencing, showing differentially expressed genes in anti-GFP synNotch fibroblasts that activate a mCherry reporter on GFP compared to off GFP. n=2 biological replicates. (B) (top) Fluorescence microscopy image of anti-GFP synNotch fibroblasts that activate myoD cultured for seven days on isotropic gelatin hydrogel conjugated with 100  $\mu\text{g}/\text{mL}$  GFP and then immunostained for  $\alpha$ -actinin (purple). Scale bar, 500 $\mu\text{m}$ . (bottom) Orientation of  $\alpha$ -actinin stained myotubes on isotropic gelatin hydrogel conjugated with 100  $\mu\text{g}/\text{mL}$  GFP, quantified by image analysis. Each line represents one image from a single tissue. Experiment performed five times with similar results. (C) Quantification of nuclei alignment for anti-GFP synNotch fibroblasts that activate myoD on the indicated hydrogels. Data represent mean  $\pm$  s.d, n=5 biological replicates. ns, p=0.8435 for isotropic tissues; ns, p=0.0972 for micromolded tissues; p=0.0015(\*\*), p<0.0001(\*\*\*\*) determined via one-way ANOVA and Tukey's test. (D) User-defined patterns and resulting fluorescence microscopy images of microcontact-printed mixture of fibronectin and GFP. Anti-GFP myoD receiver fibroblasts were cultured on surfaces for three days and then stained for sarcomeric  $\alpha$ -actinin (purple) and DAPI (blue). Scale bars, 500  $\mu\text{m}$ . Profile plot of normalized GFP intensity and  $\alpha$ -actinin immunosignal intensity on corresponding patterns. (E) Fluorescence microscopy images of nuclei stained in anti-GFP myoD receiver fibroblasts cultured for three days on surfaces uniformly coated with fibronectin, then microcontact-printed with the indicated GFP pattern. Images are from the same tissues shown in Fig. 5I. (F) Brightfield microscopy image of anti-GFP myoD receiver fibroblasts cultured on 500  $\mu\text{m}$  GFP rows for three days. Region indicated by dotted white line on the left image is shown at higher magnification in the right image. Cells with a myotube morphology are visible on patterned GFP. (G) Fluorescence microscopy images of anti-GFP myoD receiver fibroblasts cultured on the indicated substrates.  $\alpha$ -actinin stained cells on isotropic or 500 $\mu\text{m}$  row GFP patterns. Scale bars, 200 $\mu\text{m}$ . (H) Profile plots of normalized  $\alpha$ -actinin immunosignal intensity on corresponding patterns. Green lines indicate regions patterned with GFP. (I) Fluorescence microscopy images of anti-GFP myoD receiver fibroblasts cultured on GFP for three days and immunostained with anti-mouse Alexa Fluor 488 secondary antibody only (left) or mouse  $\alpha$ -actinin antibody and anti-mouse Alexa Fluor 488 secondary antibody (right). Scale bar is 500 $\mu\text{m}$ . Source data are provided as a Source Data file.

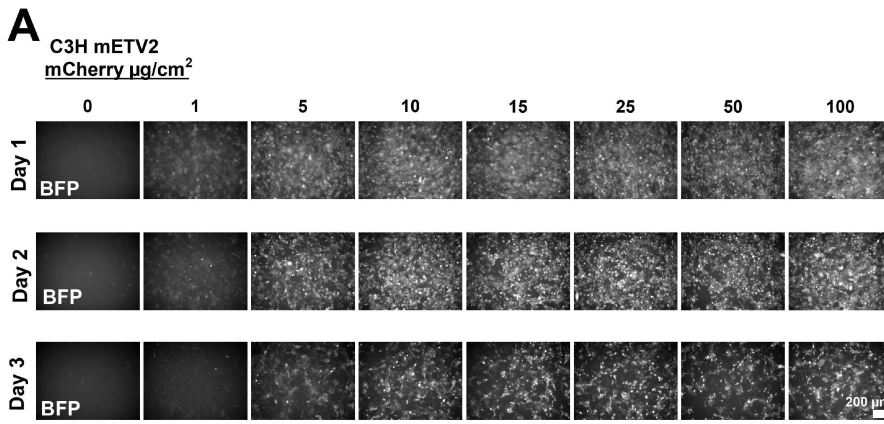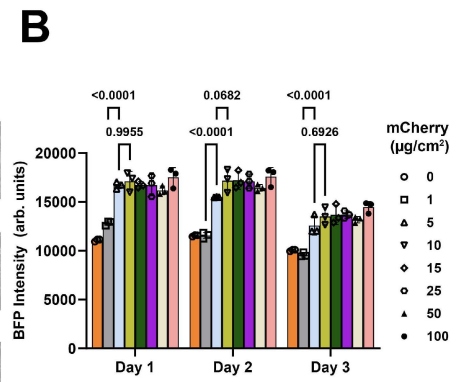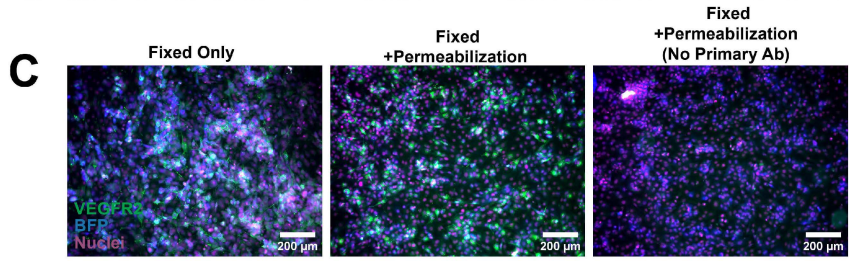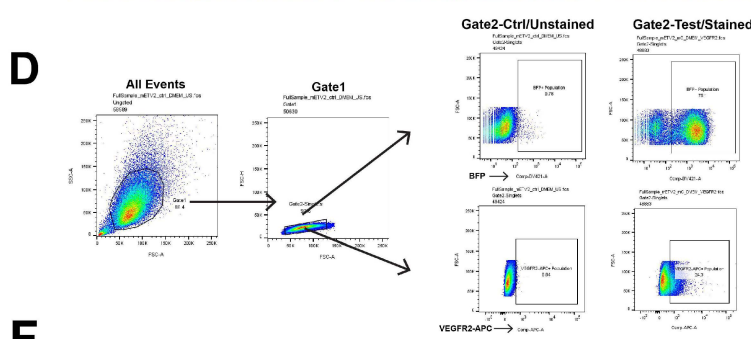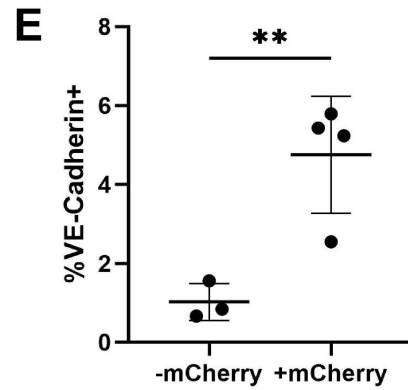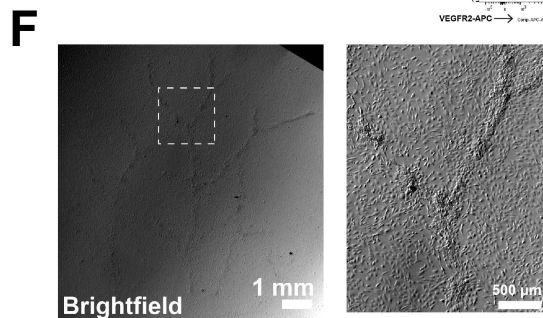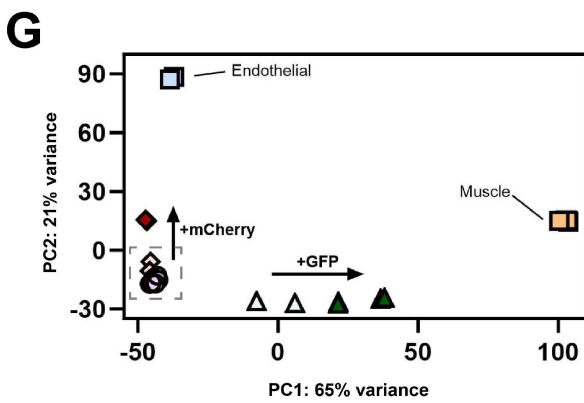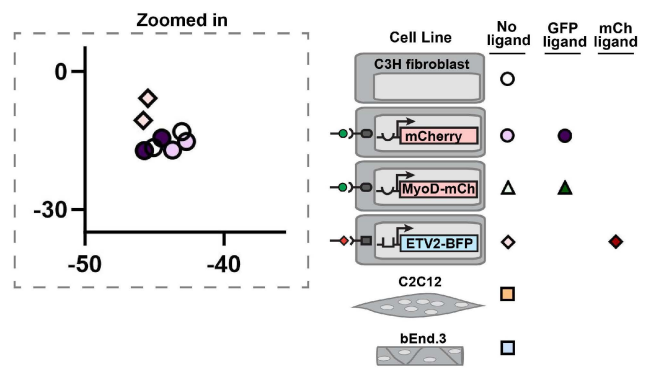

**Figure S7.** (A) Fluorescence microscopy images of anti-mCherry synNotch fibroblasts that activate ETV2 and BFP cultured for the indicated number of days on plates absorbed with indicated concentrations of mCherry. BFP signal shown in grayscale. Scale bar, 200 $\mu$ m. (B) Quantification of normalized BFP intensity for anti-mCherry synNotch fibroblasts that activate ETV2 and BFP cultured for the indicated number of days on plates absorbed with indicated concentrations of mCherry. Data represent mean  $\pm$  s.d, n=3 biological replicates. Indicated p-values determined via two-way ANOVA and Tukey's test. (C) Fluorescence microscopy images of anti-mCherry synNotch ETV2-BFP fibroblasts seeded on plate adsorbed with 15  $\mu$ g/cm<sup>2</sup> mCherry and exposed to indicated conditions to validate VEGFR2 antibody for immunostaining. Left: cells were fixed and incubated with VEGFR2 primary antibody and corresponding secondary antibody, but not permeabilized. Center: cells were fixed, permeabilized, and incubated with VEGFR2 primary antibody and corresponding secondary antibody. Right: cells were fixed, permeabilized, and incubated with secondary antibody only (no VEGFR2 antibody). Inducible BFP reporter shown in blue and nuclei stained with HSC NuclearMask Deep Red. Scale bars, 200 $\mu$ m. (D) Flow cytometry gating strategy to exclude debris (Gate 1), isolate singlets (Gate 2), and quantify BFP-expressing cells (top) or VEGFR2 expressing cells (bottom). (E) Measurement of CDH5 (VE-Cadherin) via immunostaining and flow cytometry for anti-mCherry synNotch ETV2-BFP fibroblasts cultured on plates without or with mCherry. Data represent mean  $\pm$  s.d, n=3 biological replicates for -mCherry and n=4 biological replicates for +mcherry. p=0.0093(\*\*) determined via unpaired two-tailed t-test. (F) Day 3 brightfield image of spatial endothelial-progenitor cell activation on vascular-like pattern, corresponding to the fluorescent microscope images shown in main Fig. 6H. Dotted white line indicates the region of interest enhanced in the following panel. Scale bars, 1mm and 500 $\mu$ m, respectively. (G) Principal Component Analysis (PCA) comparing the transcriptome, determined by bulk RNA sequencing, of unmodified C3H fibroblasts, cell type-specific positive control cell lines (C2C12 and Bend.3), and receiver cells that express mCherry; MyoD and mCherry; or ETV2 and BFP in the presence or absence of their corresponding ligand. n=2 biological replicates for all conditions except +GFP myoD receiver cells and C2C12, which were both n=4 biological replicates. Source data are provided as a Source Data file.

# A

mCherry ( $\mu\text{g}/\text{cm}^2$ )

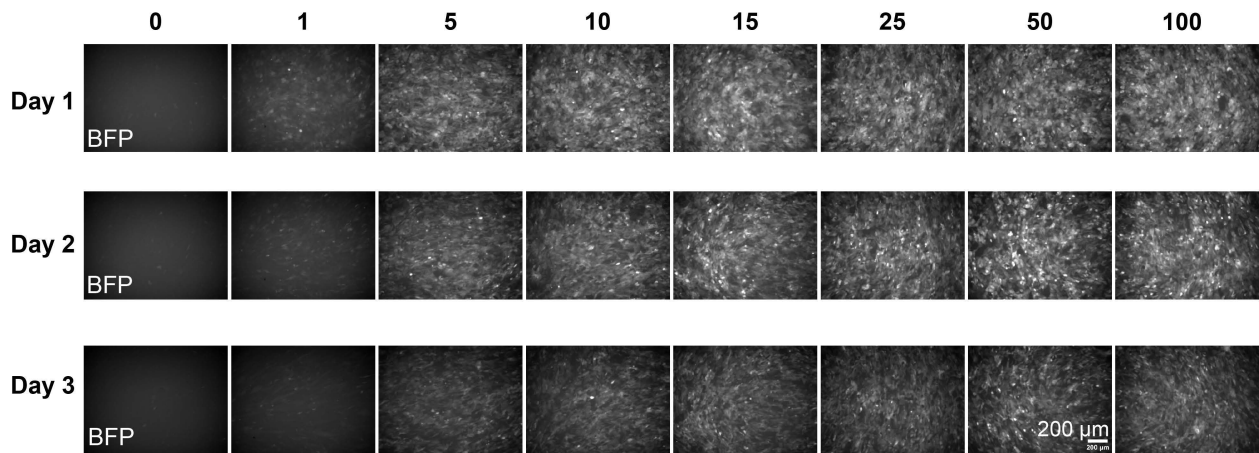

# B

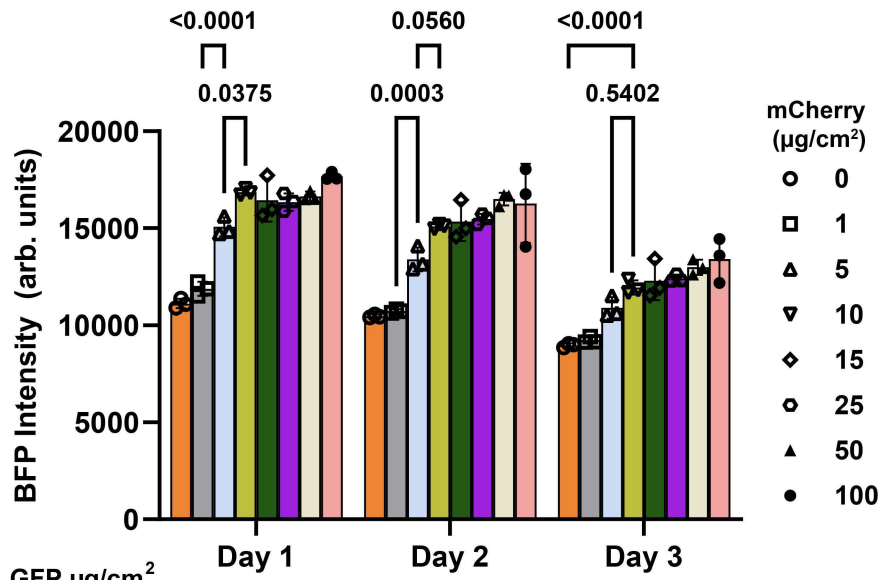

# C

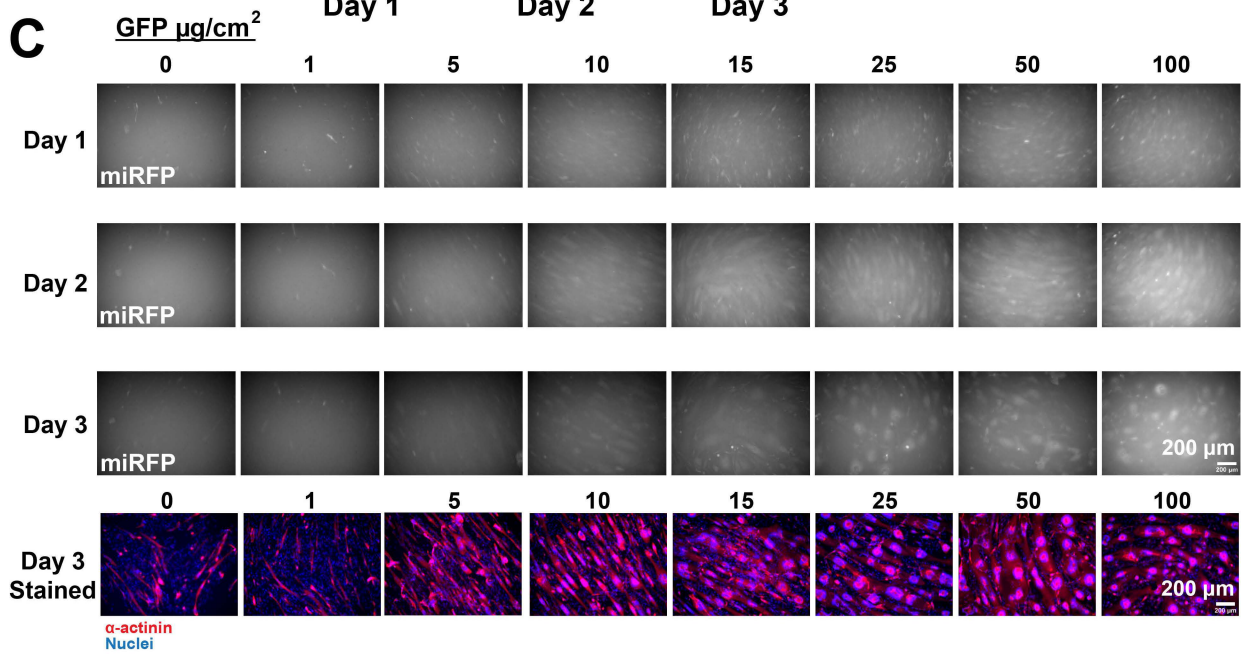

**Figure S8.** (A) Fluorescence microscopy images of anti-GFP and anti-mCherry synNotch dual-lineage fibroblasts with orthogonally inducible MyoD-miRFP and ETV2-BFP, respectively, cultured for the indicated number of days on plates adsorbed with indicated concentrations of mCherry. BFP signal shown in grayscale. Scale bar, 200 $\mu$ m. (B) Quantification of normalized BFP intensity for anti-GFP and anti-mCherry synNotch dual-lineage fibroblasts with orthogonally inducible MyoD-miRFP and ETV2-BFP, respectively, cultured for the indicated number of days on plates adsorbed with indicated concentrations of mCherry. Data represent mean  $\pm$  s.d, n=3 biological replicates. Indicated p-values determined via two-way ANOVA and Tukey's test. (C) Fluorescence microscopy images of anti-GFP and anti-mCherry synNotch dual-lineage fibroblasts with orthogonally inducible MyoD-miRFP and ETV2-BFP, respectively, cultured for the indicated number of days on plates adsorbed with indicated concentrations of GFP. miRFP signal shown in grayscale. Scale bar, 200 $\mu$ m. Experiment was performed four times with similar results. Bottom row, corresponding tissues were fixed and immunostained for  $\alpha$ -actinin (red) after three days of culture. Source data are provided as a Source Data file.



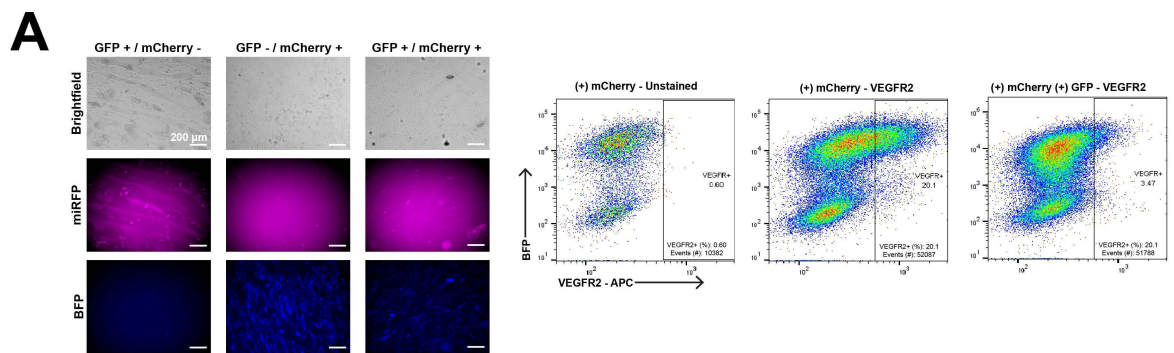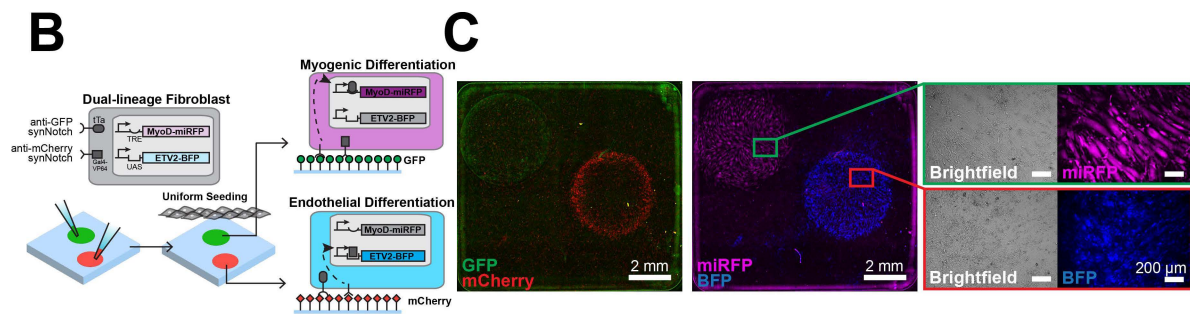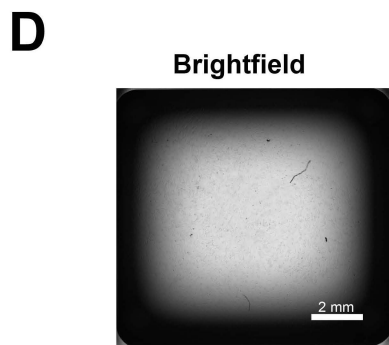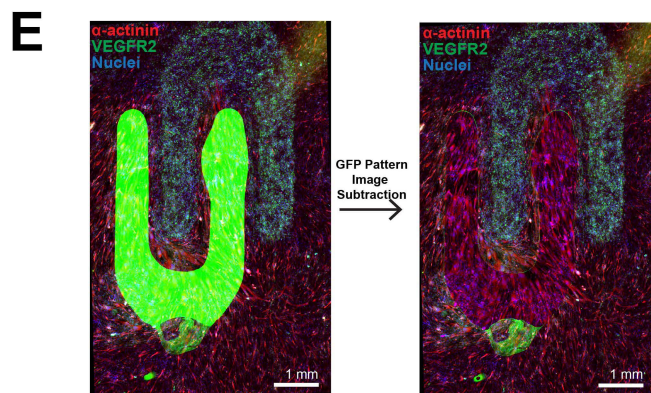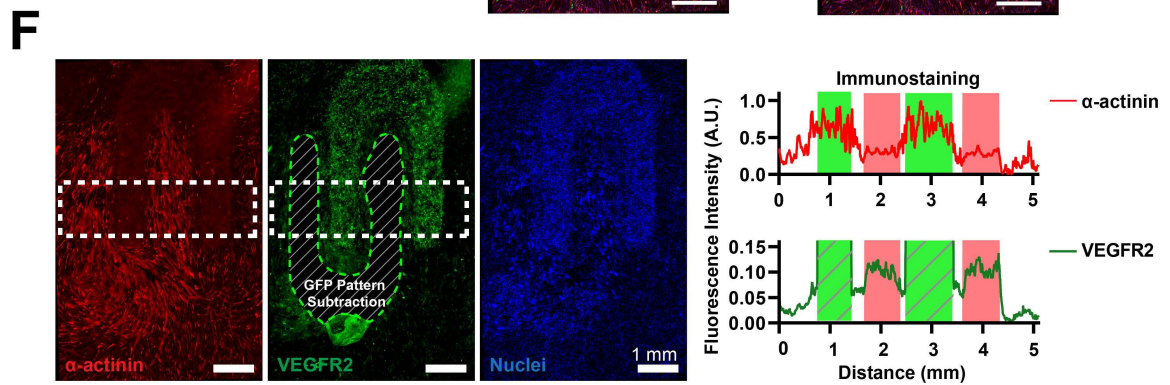

**Figure S9.** (A) Left: Brightfield and fluorescence microscopy images of anti-GFP and anti-mCherry synNotch dual-lineage fibroblasts with orthogonally inducible MyoD-miRFP and ETV2-BFP, respectively, cultured on plates uniformly adsorbed with GFP only, mCherry only, or both GFP and mCherry. Right: Flow cytometry panel (x-Axis: VEGFR2-APC, y-Axis: BFP) of dual-lineage fibroblasts seeded on plate adsorbed with 15  $\mu\text{g}/\text{cm}^2$  mCherry and then unstained (left) or stained for VEGFR2 (center). Dual-lineage fibroblasts seeded on plate adsorbed with 15  $\mu\text{g}/\text{cm}^2$  of both GFP and mCherry and then stained for VEGFR2 (right). Experiment was performed two times with similar results. (B) Schematic of ligand droplets and sequential dual-lineage fibroblast seeding. (C) Fluorescence and brightfield microscopy images of GFP and mCherry droplets (left) and subsequent reporter expression (center) by dual-lineage fibroblasts after two days of culture on corresponding substrate. Scale bars, 2 mm. Green box (within GFP pattern) and red box (within mCherry pattern) are shown at higher magnification (right). Scale bars, 200  $\mu\text{m}$ . (D) Brightfield image of dual-lineage fibroblasts cultured on droplet pattern for two days, demonstrating uniform coverage of engineered fibroblasts. Scale bar, 2 mm. (E) Fluorescence microscopy images of the same tissue shown in Fig. 7C without (left) and with (right) subtraction of GFP pattern. GFP was subtracted to improve visualization of  $\alpha$ -actinin and VEGFR2 immunostaining by dual-lineage fibroblasts on microfluidic dual-ligand pattern. Scale bars, 1mm. (F) (left) Fluorescent microscopy images of dual-lineage fibroblasts on microfluidic dual-ligand pattern (immuno)stained for  $\alpha$ -actinin (red), VEGFR2 (green), and nuclei (blue). (right) Profile plot of  $\alpha$ -actinin and VEGFR2 immunosignal across x-axis. Green and red box indicate regions patterned with GFP and mCherry, respectively. Source data are provided as a Source Data file.

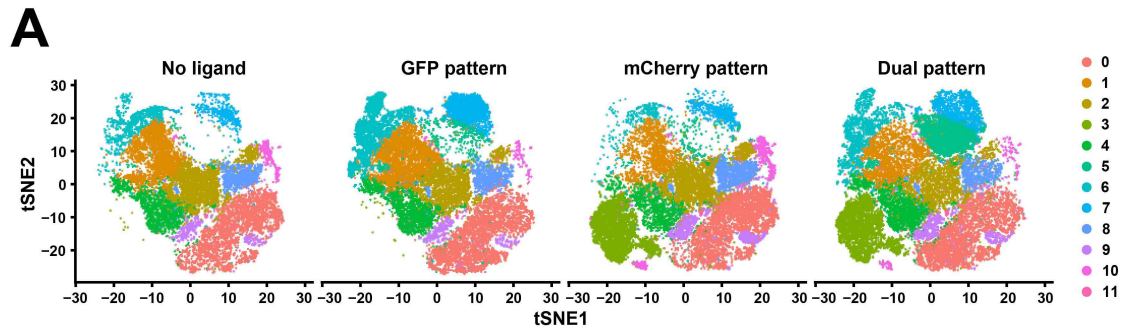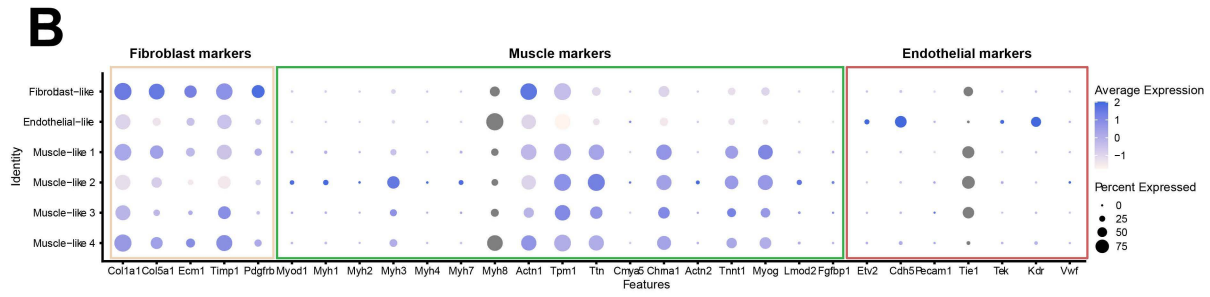

**Figure S10.** (A) T-Distributed Stochastic Neighbor Embedding (t-SNE) plot analysis showing twelve cell clusters based on gene expression profiles for anti-GFP and anti-mCherry synNotch dual-lineage fibroblasts with orthogonally inducible MyoD-miRFP and ETV2-BFP, respectively, cultured on all four indicated substrates micropatterned by microfluidics. (B) Selected marker gene analysis for fibroblast-like, endothelial-like, and the four muscle-like clusters. Color intensity represents average expression level and size of dot represents the percent of population expressing the marker. n=2 biological replicates per group sequenced independently.

| Rank                      | Cluster 0                | Cluster 1                     | Cluster 2            | Cluster 3                 |
|---------------------------|--------------------------|-------------------------------|----------------------|---------------------------|
| 1                         | <b>Cell Cycle</b>        | Differentiation               | Extracellular        | Synapse                   |
| 2                         | Chromosome               | Calmodulin Binding            | Heparin Binding      | Cell Membrane             |
| 3                         | Mitosis                  | Cardiomyopathy                | <b>Growth Factor</b> | PH                        |
| 4                         | Microtubule Cytoskeleton | <b>Muscle Contraction</b>     | Migration            | Rho GTPase                |
| 5                         | Nucleus                  | Extracellular                 | Focal Adhesion       | Ion Channel               |
| 6                         | Mitotic Assembly         | <b>Sarcoplasmic Reticulum</b> | Innate Immunity      | MAM                       |
| 7                         | Microtubule              | Actin Binding                 | Calcium binding      | Presynaptic membrane      |
| 8                         | Nucleotide Binding       | <b>Troponin</b>               | Pathways             | Cardiomyopathy            |
| 9                         | Mitotic Cell Cycle       | Transmembrane                 | Collagen             | SH3                       |
| 10                        | Isopeptide Bond          | HLH                           | kinase signaling     | <b>Angiogenesis/ VEGF</b> |
|                           | (14) EGF                 |                               | (11) EGF (13)MMP     |                           |
| <b>Assigned Identity:</b> | Fibroblast-like Dividing | Muscle-like                   | Fibroblast-like      | Endothelial-like          |

  

| Cluster 4                   | Cluster 5                         | Cluster 6                     | Cluster 7                     | Cluster 8                |
|-----------------------------|-----------------------------------|-------------------------------|-------------------------------|--------------------------|
| Posynaptic                  | Ribosome / Translation            | Actin Binding                 | Ribosome                      | Cell Cycle               |
| Differentiation             | <b>Muscle Protein</b>             | Cardiomyopathy                | <b>Muscle Protein</b>         | Chromosome               |
| Membrane                    | <b>Troponin</b>                   | Differentiation               | Cytoplasm                     | Mitosis                  |
| PH domain                   | Cytoplasm                         | <b>Sarcoplasmic Reticulum</b> | <b>Muscle Contraction</b>     | Cell Cycle               |
| Signaling Pathways          | <b>Cardiac muscle contraction</b> | Fibronectin                   | <b>Muscle Contraction</b>     | Cytoskeleton             |
| Fibronectin                 | <b>Muscle Contraction</b>         | PDZ                           | <b>Troponin</b>               | Cell Cycle               |
| SUSHI                       | EF-hand                           | PH domain                     | <b>Sarcoplasmic Reticulum</b> | ATP binding              |
| <b>Extracellular Matrix</b> | Ribosomal                         | Calmodulin                    | Cardiomyopathy                | Mitosis                  |
| <b>EGF</b>                  | Carboxylesterase                  | <b>Muscle Proteins</b>        | Striated Muscle               | Cyclin                   |
| Extracellular               | Chemotaxis                        | <b>Troponin</b>               | EF-hand                       | Isopeptide               |
|                             |                                   |                               |                               |                          |
| Fibroblast                  | Muscle-like                       | Muscle-like                   | Muscle-like                   | Fibroblast-like Dividing |

  

| Cluster 9                   | Cluster 10                  | Cluster 11                  |
|-----------------------------|-----------------------------|-----------------------------|
| Extracellular Secreted      | ribosome                    | Extracellular secreted      |
| Cell Cycle                  | cytoplasm                   | Response to virus           |
| <b>Extracellular matrix</b> | ribosome                    | <b>Extracellular matrix</b> |
| Chromosome                  | Isopeptide                  | Immune Signaling            |
| Cytoskeleton                | Splicesosome                | Furin                       |
| Heparin-binding             | Signal Recognition Particle | TSP1                        |
| <b>EGF-like</b>             | EF-Hand1                    | GFP binding                 |
| Signal Pathway              | Cell Cycle                  | Response to IFNb            |
| <b>PDGF</b>                 | Oxidative Stress            | Oxidative Stress            |
| <b>EGF-like</b>             | Antioxidant                 | TIR domain                  |
|                             |                             |                             |
| Fibroblast-like             | Fibroblast-like             | Fibroblast-like             |

**Table S1.** DAVID pathway analysis and Assigned Identity of clusters. Pathways rank from 1-10, 1 being the pathway with most genes activated in its given pathway. Pathways in bold are associated with the cluster's assigned identity. For cluster 0 and 2, identity related pathways outside the top 10 were included with their rank in parenthesis. Each cluster was compared to the gene expression of all clusters combined together. List of genes were selected through filtering with  $P < 0.01$  and  $\text{Log}_2\text{FC} > 0.5$ . P-values determined via wilcoxon rank sum test.

| RANK | Muscle 1               |                        | Muscle 1             |                 |
|------|------------------------|------------------------|----------------------|-----------------|
|      | vs. Muscle 2           |                        | vs. Muscle 3         |                 |
|      | UP                     | DOWN                   | UP                   | DOWN            |
| 1    | Ribosome               | Cardiomyopathy         | Cell Projection      | ribosome        |
| 2    | Ribosomal              | PH Domain              | Cell Differentiation | cell cycle      |
| 3    | Cytoplasm              | Actin Binding          | PH domain            | ribosomal       |
| 4    | Extracellular Secreted | Sarcoplasmic Reticulum | Calmodulin binding   | Chromosome      |
| 5    | Isopeptide Bond        | PDZ                    | Hormone              | Cytoskeleton    |
| 6    | Collagen/PDGFR binding | RhoGTP                 | Rap1 Signaling       | Isopeptide Bond |
| 7    | Signaling              | Differentiation        | Transcription        | Mitosis         |
| 8    | Iron                   | Muscle Protein         | Cell Junction        | GrowthFactor    |
| 9    | Antioxidant            | Fibronectin            | PDZ                  | Microtubule     |
| 10   | Signaling Pathway      | SH3 Domain             | SH3                  | EF-hand         |
|      | (14) EGF               |                        |                      |                 |

| Muscle 1               |                        | Muscle 2       |                        |
|------------------------|------------------------|----------------|------------------------|
| vs. Muscle 4           |                        | vs. Muscle 3   |                        |
| UP                     | DOWN                   | UP             | DOWN                   |
| Developmental Protein  | ribosome               | PH domain      | ribosome               |
| Actin Binding          | cell cycle             | Cardiomyopathy | ribosome               |
| Calmodulin Binding     | ribosome               | Actin Binding  | cell cycle             |
| Extracellular Matrix   | extracellular secreted | PDZ            | extracellular secreted |
| Cardiomyopathy         | chromosome             | SH3            | isopeptide             |
| Glycoprotein           | actin binding          | RhoGTP         | extracellular matrix   |
| PDZ                    | extracellular matrix   | Cell Junction  | mitosis                |
| Sarcoplasmic Reticulum | Isopeptide bond        | G8 Domain      | mitosis                |
| Fibronectin/IgG        | EF-hand                | SAM Domain     | immune signaling       |
| PH domain              | Microtubule            | Hormone        | microtubule            |
|                        |                        |                |                        |

| Muscle 4                |                        | Muscle 4               |                        |
|-------------------------|------------------------|------------------------|------------------------|
| vs. Muscle 2            |                        | vs. Muscle 3           |                        |
| UP                      | DOWN                   | UP                     | DOWN                   |
| Ribosome                | actin binding          | PH domain              | sarcomere              |
| Cell Cycle              | differentiation        | Extracellular matrix   | actin binding          |
| Ribosomal               | sarcoplasmic reticulum | Extracellular secreted | sarcoplasmic reticulum |
| Extracellular Secreted  | Fibronectin            | CH dom                 | extracellular secreted |
| Differentiation         | Ph domain              | Rho GTPase             | muscle contraction     |
| PH domain               | PDZ                    | Domain                 | muscle protein         |
| Fibronectin             | cardiomyopathy         | Actin binding          | signal                 |
| Actin Binding           | muscle protein         | Signaling Pathway      | protein response       |
| Chromosome              | cell junction          | Cell Cycle             | cardiac contraction    |
| Rho GTPase              | SH3 domain             | Membrane               | peptide signaling      |
| (13) Muscle Contraction |                        |                        |                        |

**Table S2.** DAVID pathway analysis and comparison of UP and DOWN regulated pathways between all muscle-like clusters. Pathways rank from 1-10, 1 being the pathway with most genes UP or Down regulated between muscle-like clusters. Identity related pathways outside the top 10 were included with their rank in parenthesis. List of genes were selected through filtering with  $P < 0.01$  and  $\text{Log}_2\text{FC} > 0.5$ . P-values determined via wilcoxon rank sum test.

| <u>Company</u>              | <u>Catalog</u> | <u>Target</u>                        | <u>Fluorophore</u> | <u>Dilution</u>               |
|-----------------------------|----------------|--------------------------------------|--------------------|-------------------------------|
| Cell Signaling Technologies | 3739S          | Anti-Myc (EQKLISEEDL)                | PE                 | FC: 1:50                      |
| Cell Signaling Technologies | 15008S         | Anti-FLAG (DYKDDDDK)                 | AlexaFluor 488     | FC: 5uL/10 <sup>6</sup> cells |
| Abcam                       | ab45688        | Anti-Fibronectin                     |                    | IF 1:500                      |
| BioLegend                   | 136401         | Anti-VEGFR2                          |                    | IF: 1:100                     |
| BioLegend                   | 136405         | Anti-VEGFR2                          | APC                | FC: 1:100                     |
| Sigma                       | A7811          | Anti- $\alpha$ -Actinin (Sarcomeric) |                    | IF: 1:200                     |
| ThermoFisher                | 14-1441-82     | Anti-VE-cadherin                     |                    | IF: 1:100                     |
| BioLegend                   | 138005         | Anti-VE-cadherin                     | AlexaFluor 647     | FC: 1:100                     |
| ThermoFisher                | A-11030        | Anti-Mouse IgG                       | AlexaFluor 546     | IF: 1:200                     |
| Abcam                       | ab150153       | Anti-Rat IgG                         | AlexaFluor 488     | IF: 1:200                     |
| ThermoFisher                | A-2144         | Anti-Rabbit IgG                      | AlexaFluor 647     | IF: 1:1000                    |
| ThermoFisher                | A-21235        | Anti-Mouse IgG                       | AlexaFluor 647     | IF 1:200                      |
| ThermoFisher                | H10294         | HSC NuclearMask Deep Red             |                    | IF: 1:250                     |
| Abcam                       | ab228551       | Hoechst 33342                        |                    | IF: 1:20,000                  |
| ThermoFisher                | R37605         | Hoechst 33342                        |                    | IF: 2drops/mL                 |

**Table S3.** Antibodies used in this study

pHR-TRE-mCherry

**mCherry\_F** - CACAACACTTTTGTCTTATACTTAcgcgtGCCGCCACCatggtgagcaagggcgaggag

**mCherry\_R** - atgttgacaggtgggagttgcggccgcTACTTGTACAGCTCGTCCATGccc

pHR\_EF1a\_flagLaM4-Notch-Gal4VP64

**Gal4VP64\_F** - gtgctgctgtcccgaagcggcgatgaagctgct

**Gal4VP64\_R** - atcaagcttgcctgcaggtcgactctagag

pHR-TRE-miRFP703\_PGK-Puro

**PGK-Puro\_F** - TCATTGGTCTTAAAGTTTCTTTATGTTTTAAATGCACTGACCTCCCAC

**PGK-Puro\_R** - ATTAATTCGAGCTCGGTACCTCTACCGGGTAGGGGAGG

**miRFP\_F** - TCTTATACTTAcgcgtGCcggcaccatggtagcag

**miRFP\_R** - gtgggagttgcggccgcttagctctcaagcgcggtgatcc

pHR-TRE-MyoD-p2A-miRFP703\_PGK-Puro

**PGK-Puro\_F** - TCATTGGTCTTAAAGTTTCTTTATGTTTTAAATGCACTGACCTCCCAC

**PGK-Puro\_R** - ATTAATTCGAGCTCGGTACCTCTACCGGGTAGGGGAGG

**MyoD-p2A\_F** - TCTTATACTTAcgcgtGCCGCCACCATGGAAGTCTCTCGC

**MyoD-p2A\_R** - gctacatAGGTCCAGGGTTCTCC

**miRFP\_F** - TGGACCTatggtagcaggtcatgctct

**miRFP\_R** - gtgggagttgcggccgcttagctctcaagcgcggtgatcc

pHR-UAS-tagBFP\_PGK-HygR

**PGK-HygR\_F** - cgactctagagtcgacgggtaggggagggcgctt

**PGK-HygR\_R** - ttccctcagaggtcgaccatagagcccaccgc

**BFP\_F** - gacattcggttgatccGCCGCCaccatgagcagctgattaagg

**BFP\_R** - gtgggagttgcggccgcggggagggcgg

pHR-UAS-ETV2-p2A-tagBFP\_PGK-HygR

**PGK-HygR\_F** - cgactctagagtcgacgggtaggggagggcgctt

**PGK-HygR\_R** - ttccctcagaggtcgaccatagagcccaccgc

**ETV2\_F** - ctctcgacattcggttgatccGCCACCatggacctgtggaact

**ETV2\_R** - CTCCGCTTCCttggccttctgcacctgg

**p2A-BFP\_F** - agaaggccaaGGAAGCGGAGCTACTAACTTCAG

**p2A-BFP\_R** - tgcaggtgggagttgcggccgcggggagggcgg

Mouse ETV2

MDLWNWDEASLQEVPPGDKLTGLGAEFGFYFPEVALQEDTPITPMNVEGCWKGFPELDWNPALP  
HEDVPFQAEPVAHPLPWSRDWTDLGCNTSDPWSCASQTPGPAPPGTSPSPFVGFEGATGQNPA  
TSAGGVPSWSHPPAAWSTTSWDCSVGPSGATYWDNGLGGEAHEDYKMSWGGGSAGSDYTTTW  
NTGLQDCSIPFEHQSPAFTTPSKSNKQSDRATLTRYSKTNHRGPIQLWQFLELLHDGARSSCIR  
WTGNSREFQLCDPKEVARLWGERKRKPGMNYEKLRSRLRYYYRRDIVLKSNGGRKYTYRFGGRVP  
VLAYQDDMGHLPGAEGQ\*

**Oligonucleotides used in this study.**



```

// start code
// Custom shuffle function
function shuffleArray(array) {
    for (i = array.length - 1; i > 0; i--) {
        j = floor(random() * (i + 1));
        temp = array[i];
        array[i] = array[j];
        array[j] = temp;
    }
    return array;
}

// Get the current image
image = getImageID();
selectImage(image);
getDimensions(width, height, channels, slices, frames);

// Get the pixel values
array = newArray(width * height);
for (y = 0; y < height; y++) {
    for (x = 0; x < width; x++) {
        index = x + y * width;
        array[index] = getPixel(x, y);
    }
}

// Shuffle the array
array = shuffleArray(array);

// Create a new image to hold the scrambled pixels
newImage("Scrambled Image", "8-bit black", width, height, 1);
selectWindow("Scrambled Image");

// Set the scrambled pixels
for (y = 0; y < height; y++) {
    for (x = 0; x < width; x++) {
        index = x + y * width;
        setPixel(x, y, array[index]);
    }
}

// Show the scrambled image
updateDisplay();
// end code

```

**Image pixel shuffler code for ImageJ**
